# Supplementary material for: The Anti-Inflammatory Effect of Low Molecular Weight Fucoidan from Sargassum siliquastrum in Lipopolysaccharide-Stimulated RAW 264.7 Macrophages via Inhibiting NF-κB/MAPK Signaling Pathways
Source: MDPI journal article supplement (doi:10.3390/md21060347), 2023-06-04
Supplement: s1 [file s1]

## Supplementary Material

**Journal:** Marinedrugs

**Manuscript ID.:** marinedrugs-2404655

**Title of Paper:** Anti-Inflammatory Effect of Low Molecular Weight Fucoidan from *Sargassum siliquastrum* in Lipopolysaccharide-Stimulated RAW 264.7 Macrophages via Inhibiting NF- $\kappa$ B/MAPK Signaling Pathways

**Authors:** Arachchige Maheshika Kumari Jayasinghe, Kirinde Gedara Isuru Sandanuwan Kirindage, Ilekkuttige Priyan Shanura Fernando, Kil-Nam Kim, Jae-Young Oh, Ginnae Ahn \*

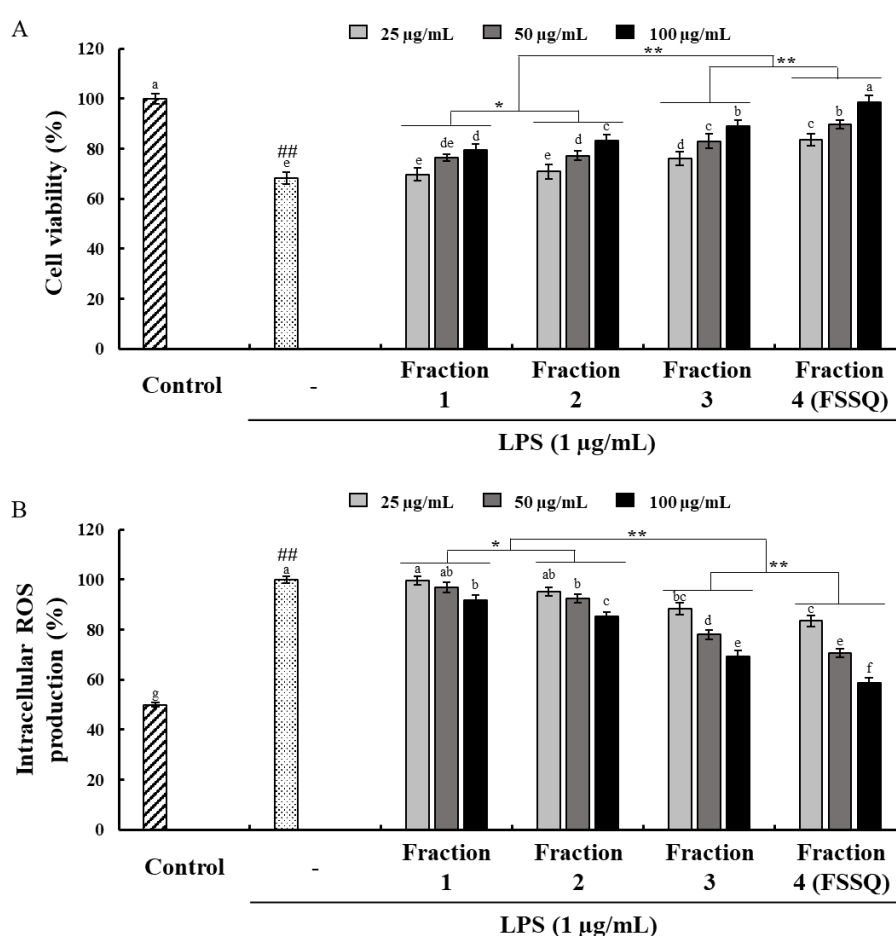

**Figure S1.** Effects of polysaccharide fractions on (A) cell viability and (B) intracellular ROS levels after LPS stimulation. Fraction 4 (FSSQ) indicated considerable cytoprotective effects in contrast to Fraction 1, 2, and 3. The values represent data from three distinct experiments (n=3) and are shown as the mean  $\pm$  standard error (SE). Significantly different results were indicated with different lowercase English letters ( $p < 0.05$ ). (\* $p < 0.05$ ; \*\* $p < 0.01$  vs the LPS-treated group, ##  $p < 0.01$  in contrast to the control group).
